# Supplementary material for: Phosphorus anionic redox activity revealed by operando P K-edge X-ray absorption spectroscopy on diphosphonate-based conversion materials in Li-ion batteries
Source: Royal Society of Chemistry journal article supplement (doi:10.1039/c8cc01350k), 2018-01-01
Supplement: c8cc01350k1.pdf [file c8cc01350k1.pdf]

## Phosphorus anionic redox activity revealed by operando P K-edge X-ray absorption spectroscopy on diphosphonate-based conversion materials in Li-ion batteries

Sebastian Schmidt<sup>1</sup>, Sébastien Sallard<sup>1,3,\*</sup>, Camelia Borca<sup>2</sup>, Thomas Huthwelker<sup>2</sup>, Petr Novák<sup>1</sup> and Claire Villevieille<sup>1,\*</sup>

<sup>1</sup> Electrochemical Energy Storage Section, Paul Scherrer Institute, CH-5232 Villigen PSI, Switzerland

<sup>2</sup> Swiss Light Source (SLS), Paul Scherrer Institute, CH-5232 Villigen PSI, Switzerland

<sup>3</sup> Current address: Flemish Institute of Technological Research (VITO), Boeretang 200, B-2400 Mol, Belgium

\*Corresponding authors: [claire.villevieille@psi.ch](mailto:claire.villevieille@psi.ch); [sebastien.sallard@vito.be](mailto:sebastien.sallard@vito.be)

### Supplementary information

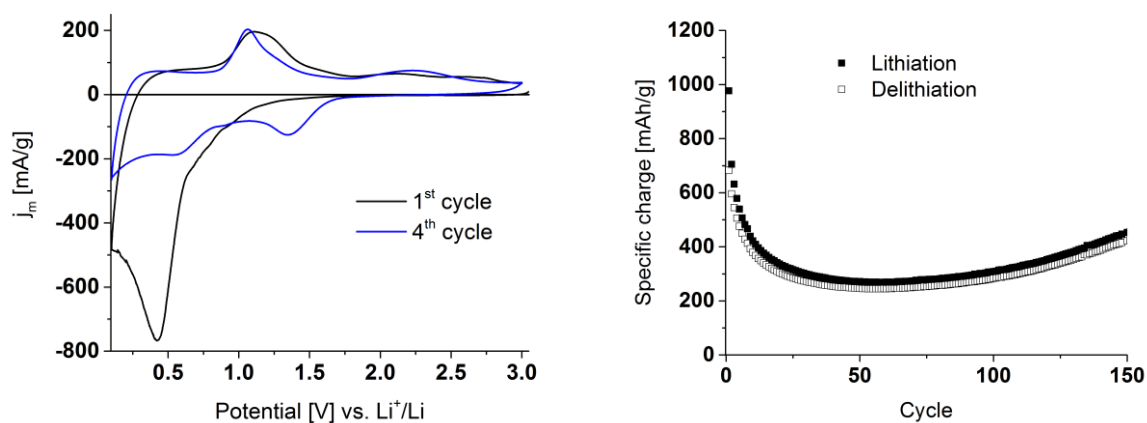

**Figure S1** Cyclic voltammograms at 0.1 mV s<sup>-1</sup> (left) and specific charge vs. cycle number (right) data for the galvanostatic cycling of FeMeDP at 50 mA g<sup>-1</sup> between 0.1 – 3.0 V vs. Li<sup>+</sup>/Li. Reprinted with permission from J. Power Sources, 2017, 342, 879-885, © 2016 Elsevier BV. The experiments were already published in Ref. 7.

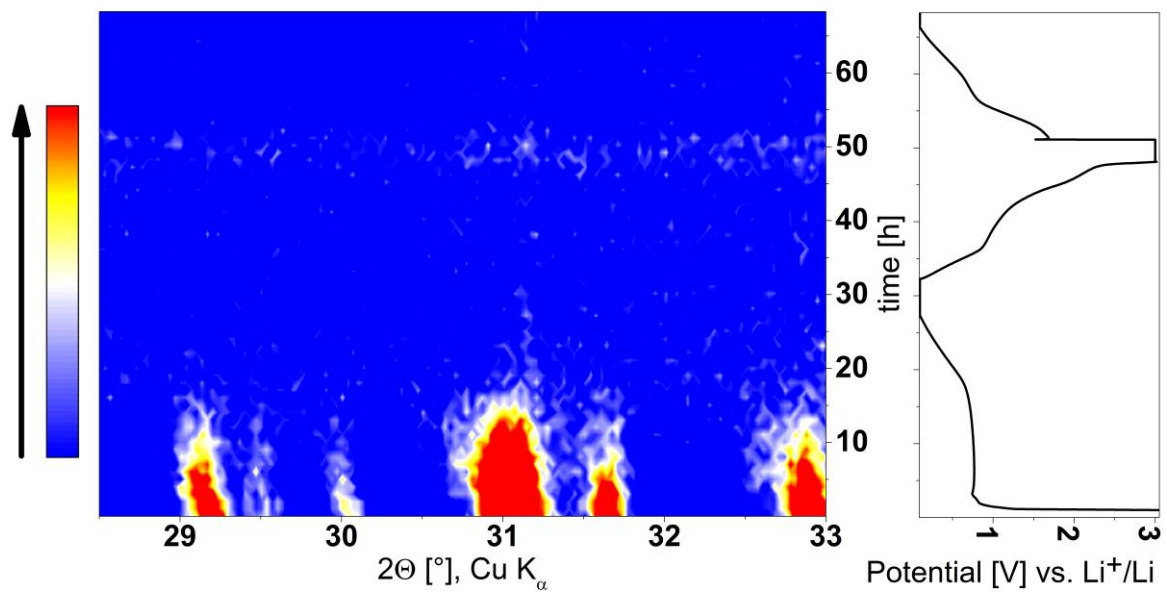

**Figure S2** Contour plot of *operando* XRD patterns of FeMeDP cycled between 0.1 - 3.0 V at  $50 \text{ mA g}^{-1}$  from a previous study. Reprinted with permission from J. Power Sources, 2017, 342, 879-885, © 2016 Elsevier BV. The experiments were already published in Ref. 7.
